# Supplementary material for: Trap passivation and efficiency improvement of perovskite solar cells by a guanidinium additive
Source: Royal Society of Chemistry journal article supplement (doi:10.1039/c9qm00112c), 2019-01-01
Supplement: c9qm00112c1.pdf [file c9qm00112c1.pdf]

## Supplementary Information

### Trap Passivation and Efficiency Improvement of Perovskite Solar Cells by a Guanidinium Additive

Jiaxu Yao<sup>a,b</sup>, Hui Wang<sup>a,b</sup>, Pang Wang<sup>a,b</sup>, Robert S. Gurney<sup>a,b</sup>, Akarin Intaniwet<sup>c</sup>,

Pipat Ruankham<sup>d</sup>, Supab Choopun<sup>d</sup>, Dan Liu<sup>a,b\*</sup>, Tao Wang<sup>a,b\*</sup>

<sup>a</sup>State Key Laboratory of Silicate Materials for Architectures, Wuhan University of Technology, Wuhan, 430070, China \* E-mail: dliu@whut.edu.cn; twang@whut.edu.cn

<sup>b</sup>School of Materials Science and Engineering, Wuhan University of Technology, Wuhan, 430070, China

<sup>c</sup>Smart Energy and Environment Research Unit, School of Renewable Energy, Maejo University, Chiang Mai 50290, Thailand

<sup>d</sup>Department of Physics and Materials Science, Faculty of Science, Chiang Mai University, Chiang Mai 50200, Thailand

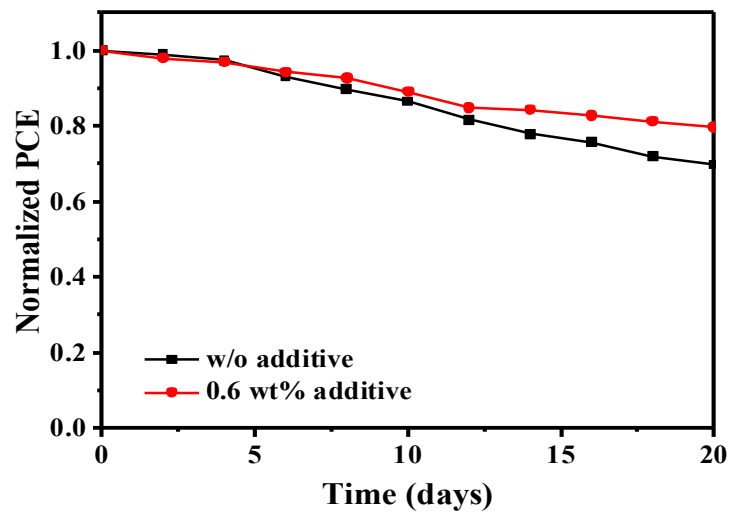

Figure S1. The storage life time of devices without and with 0.6 wt% DAGCl additive.

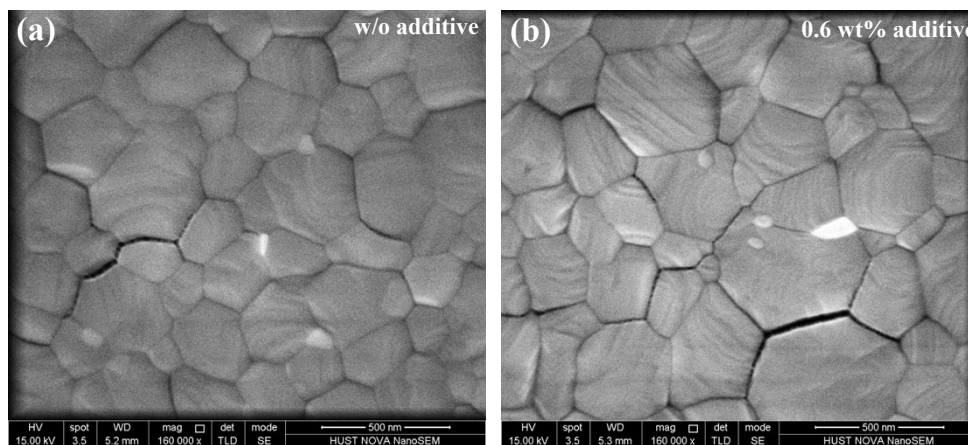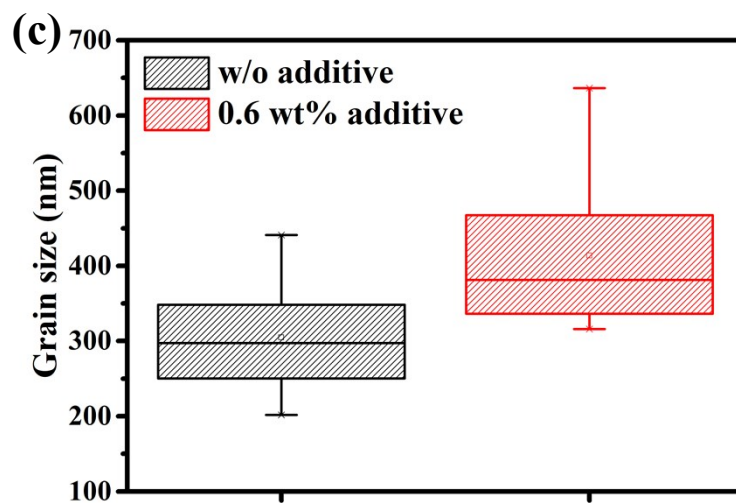

Figure S2 (a,b) Surface-view SEM images of perovskite films without and with the optimized concentration of DAGCl additive. c) The statistic plot of grains size based on images a and b.

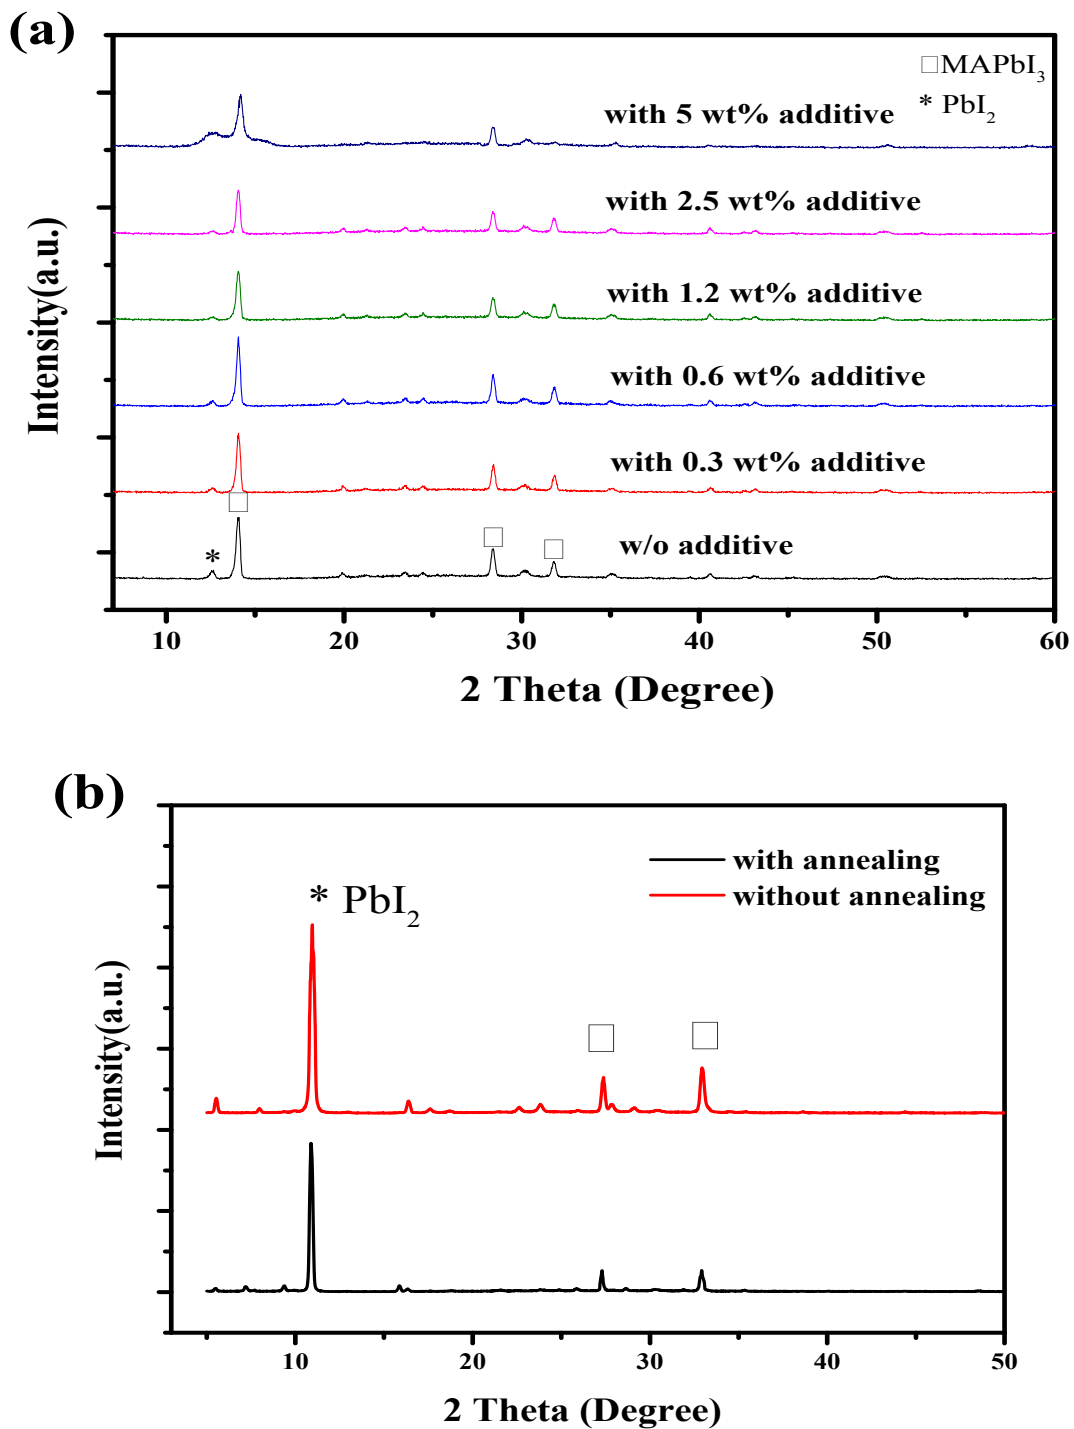

Figure S3. (a) XRD spectra of perovskite films containing different contents of DAGCl. (b) XRD spectra of films cast from precursors containing DAGCl and PbI<sub>2</sub>.

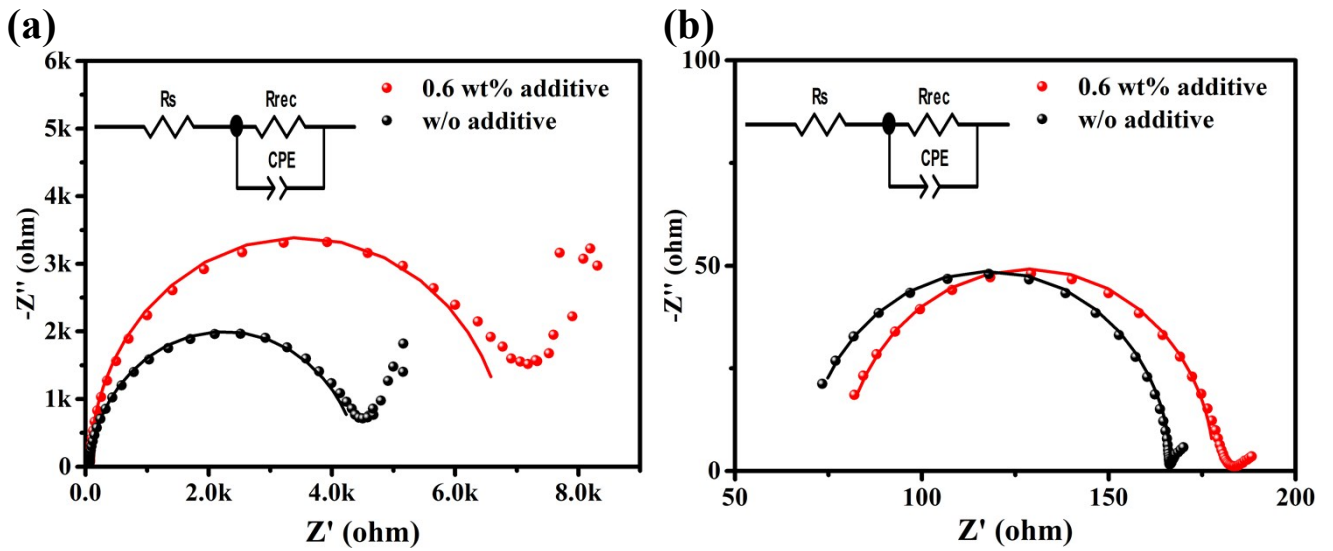

Figure S4. (a) and (b) EIS measurements by applying a low voltage (0.2 v) and high voltage (1.0 v), under 1-sun illumination, without and with the optimized concentration of DAGCl additive.

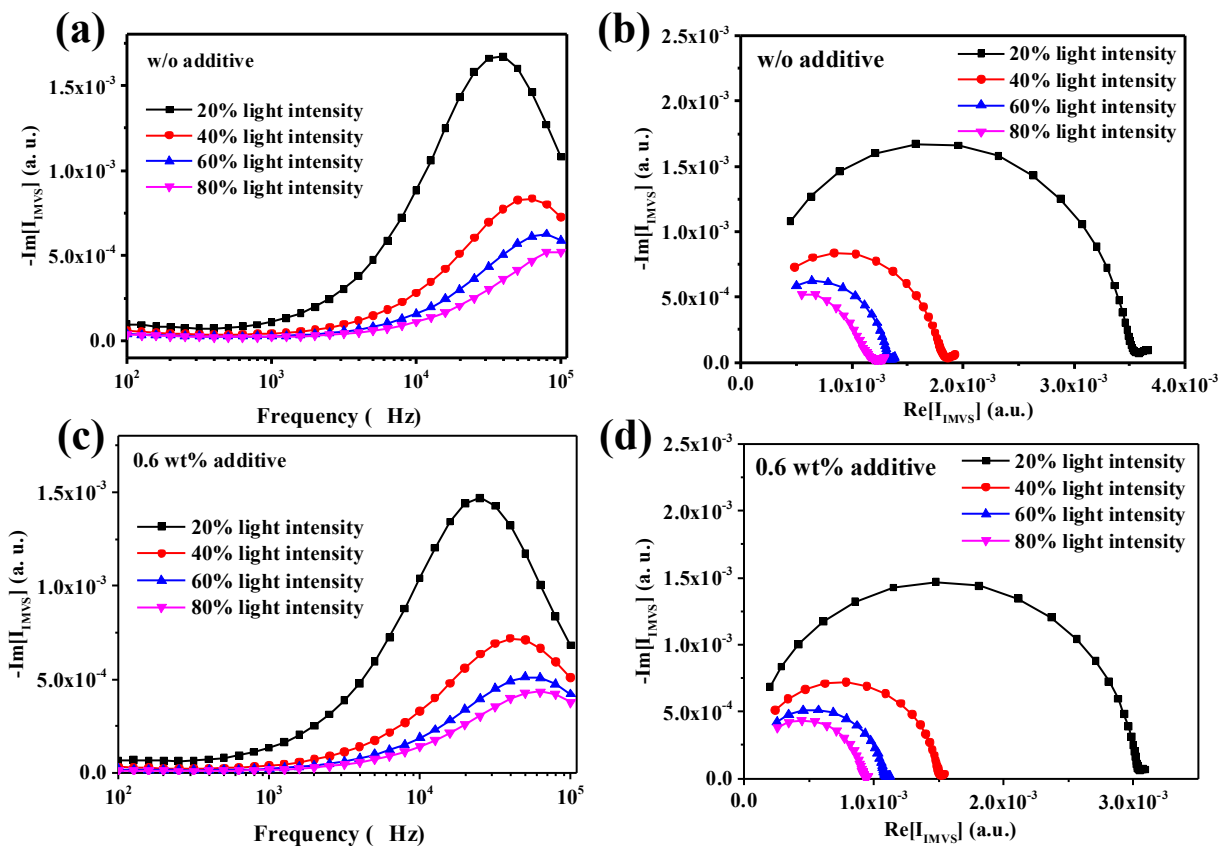

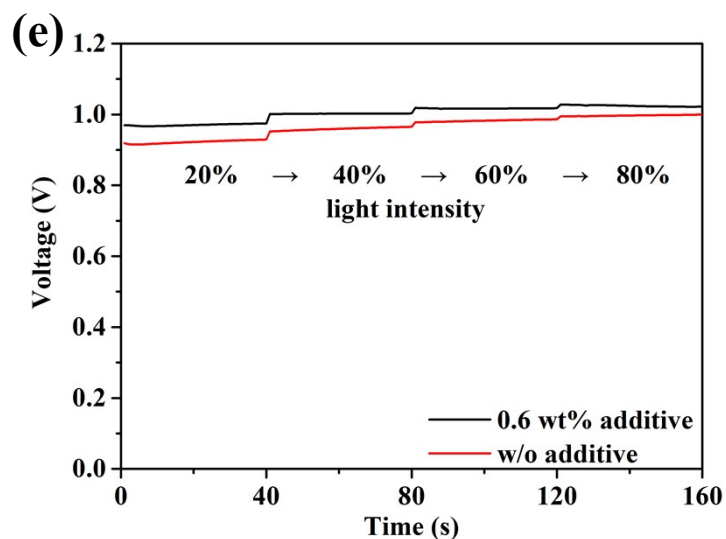

Figure S5. Bode plot and Nyquist plot of PSC without additive (a, b) and with 0.6 wt% DAGCl (c, d) from IMVS testing, respectively. e) The voltage changes at different light intensity during an IMVS test.

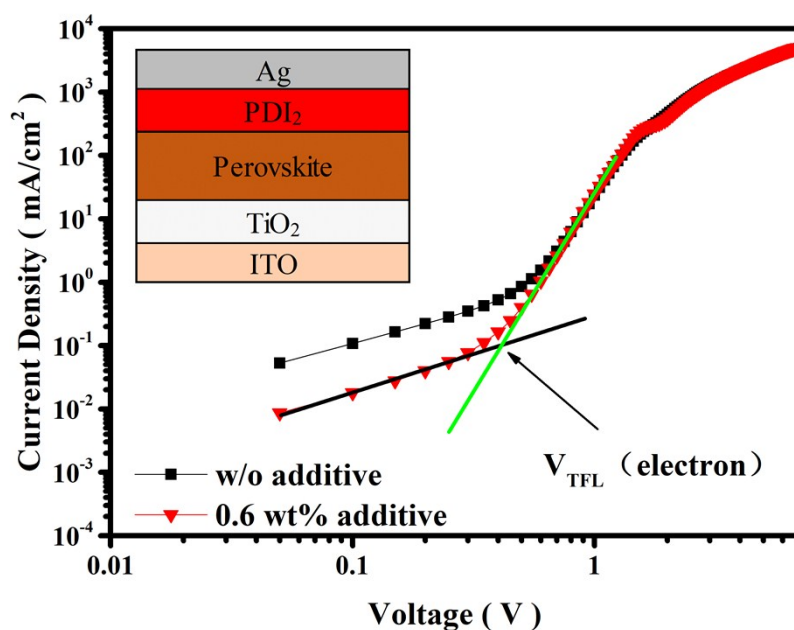

Figure S6. Dark current–voltage curves of electron-only devices employing an n-type semiconductor PDI<sub>2</sub> to replace PCBM.
